# Supplementary material for: Underutilized Canadian wild berries as potential sources of lipophilic bioactive compounds with antihypertensive properties
Source: Royal Society of Chemistry journal article supplement (doi:10.1039/d4fo00665h), 2024-01-01
Supplement: d4fo00665h1.pdf [file d4fo00665h1.pdf]

1 **Supplementary material 1**

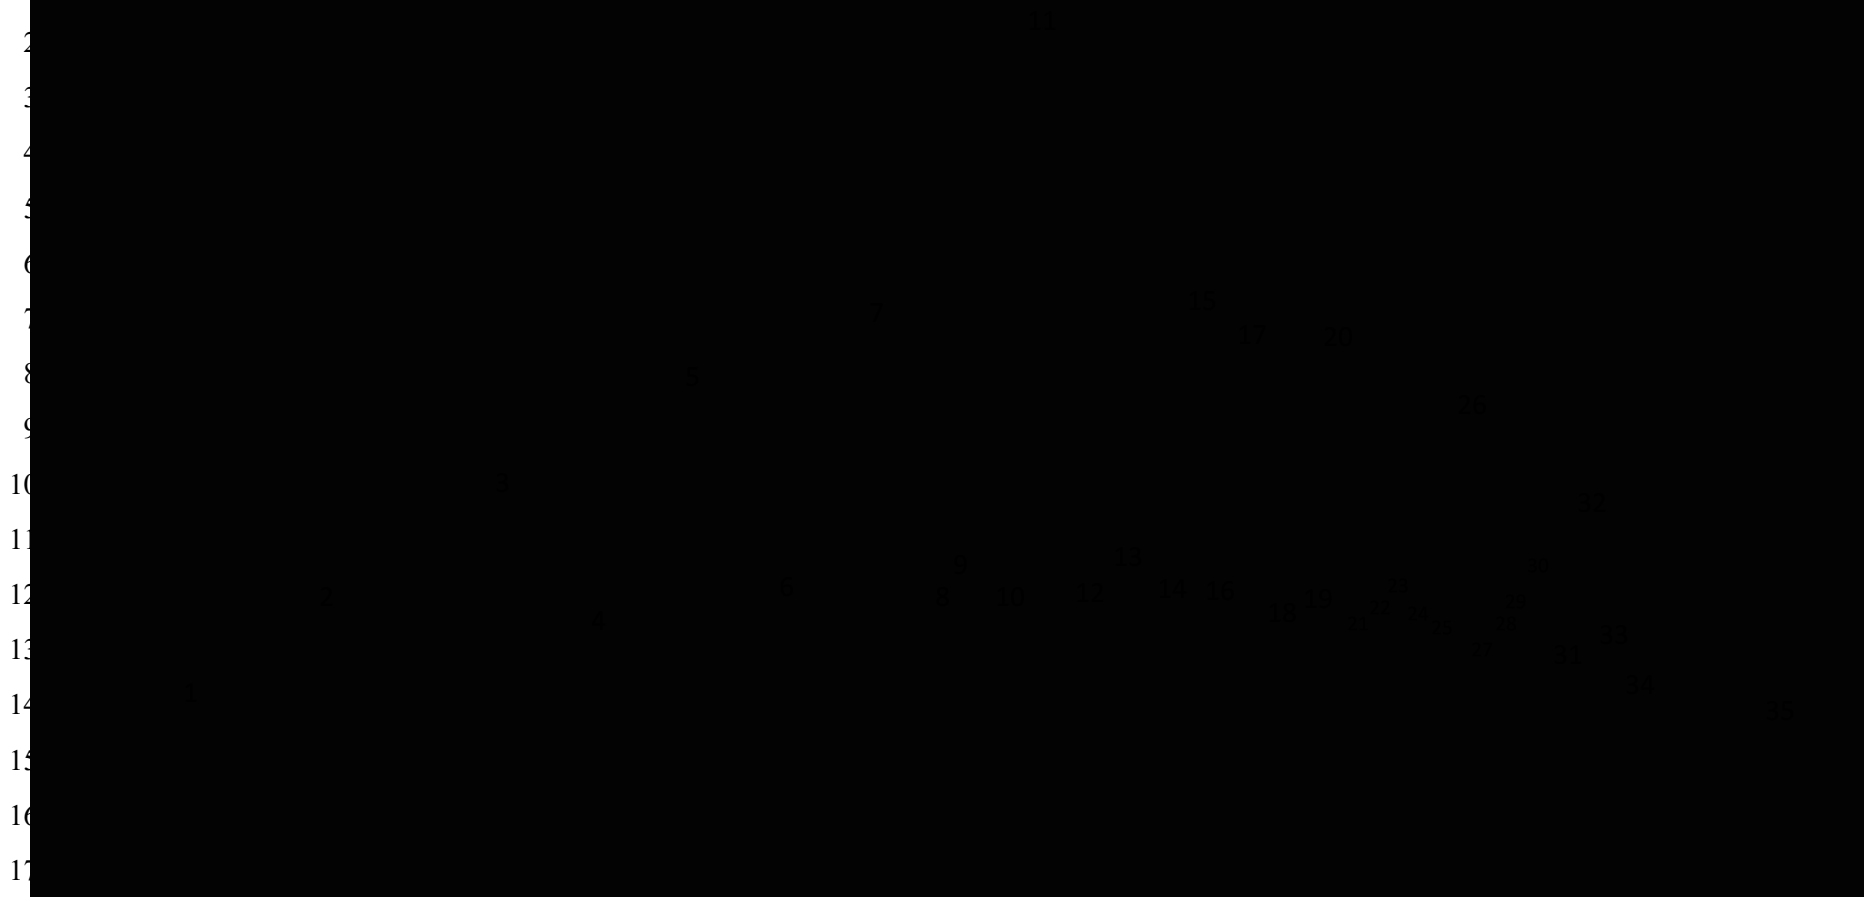

18 **Figure S1.** The GC-MS chromatogram of tested fatty acid methyl esters, 1. Methyl hexanoate; 2. Methyl octanoate; 3. Methyl decanoate;  
19 4. Methyl undecanoate; 5. Methyl laurate; 6. Methyl tri decanoate; 7. Methyl myristate; 8. Methyl myristate; 9. Methyl pentadecanoate;  
20 10. Methyl cis-10-pentadecenoate; 11. Methyl palmitate; 12. Methyl palmitoleate; 13. Methyl heptadecanoate; 14. cis-10-Heptadecanoic  
21 acid methyl ester; 15. Methyl stearate; 16. trans-9-Elaidic acid methyl ester; 17. cis-9-Oleic acid methyl ester; 18. Methyl linolelaidate;  
22 19. Methyl linoleate; 20. Methyl arachidate; 21. Methyl  $\gamma$ -linolenate; 22. Methyl cis-11-eicosenoate; 23. Methyl linolenate; 24. Methyl

23 heneicosanoate; 25. cis-11,14-Eicosadienoic acid methyl ester; 26. Methyl behenate; 27. cis-8,11,14-Eicosatrienoic acid methyl ester;  
24 28. Methyl erucate; 29. cis-11,14,17-Eicosatrienoic acid methyl ester; 30. Methyl tricosanoate; 31. cis-13,16-Docosadienoic acid methyl  
25 ester; 32. Methyl lignocerate; 33. cis-5,8,11,14,17-Eicosapentaenoic acid methyl ester; 34. Methyl nervonate; 35. cis-4,7,10,13,16,19-  
26 Docosaheptaenoic acid methyl ester

27 **Supplementary material 2**

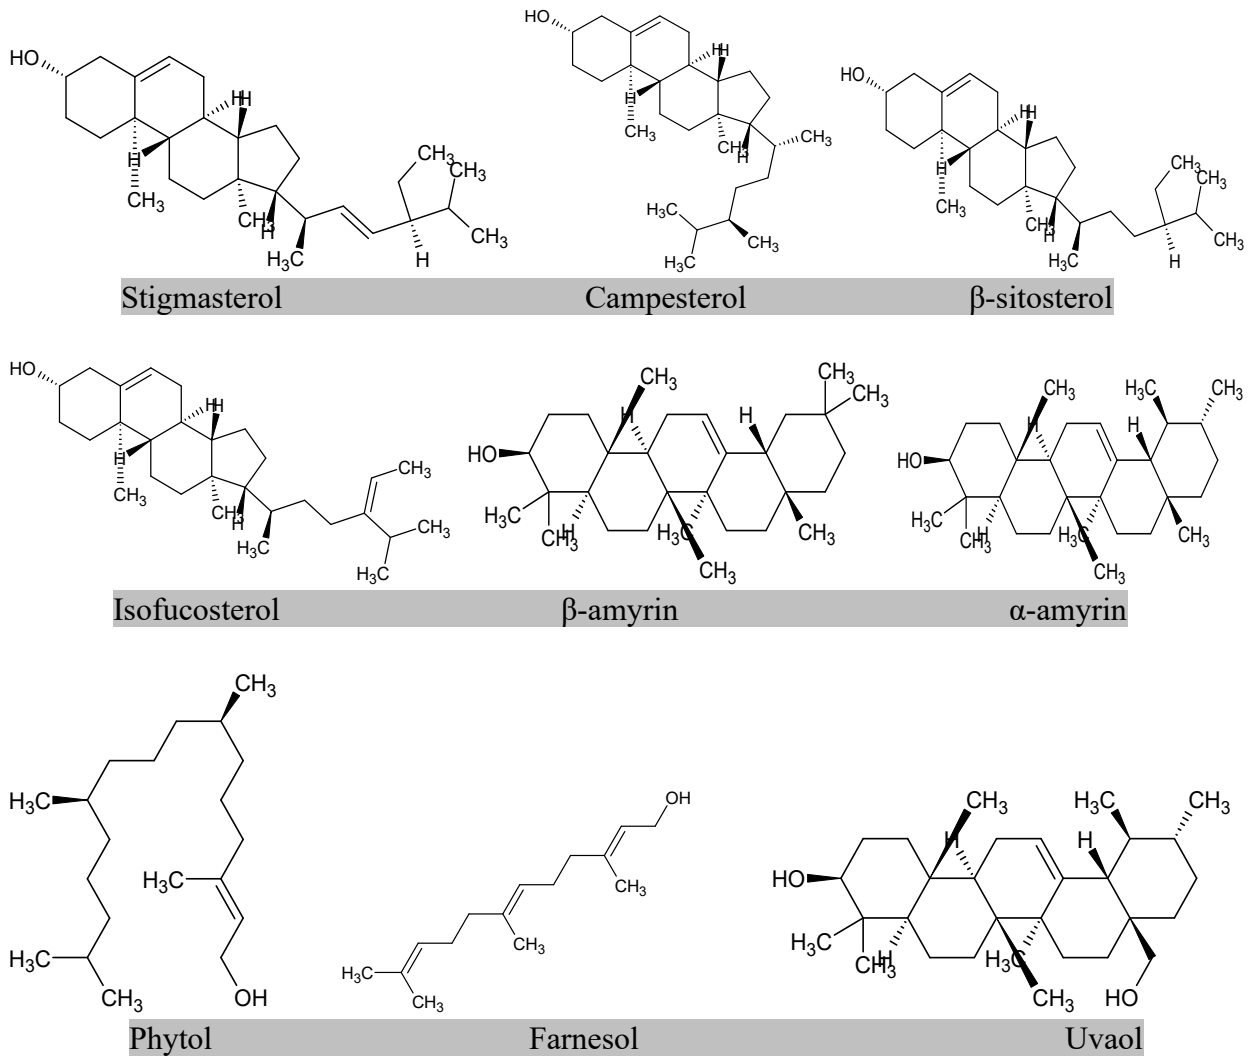

37 **Figure S2.** The chemical structures of the phytyl sterols and terpenes identified by GC-MS in  
38 Canadian wild berries

39  
40  
41  
42  
43  
44  
45  
46  
47  
48  
49  
50

51 **Supplementary material 3**

52  
53  
54  
55  
56  
57  
58  
59  
60  
61  
62  
63  
64  
65  
66  
67  
68  
69  
70  
71  
72  
73  
74  
75  
76  
77  
78  
79  
80  
81  
82  
83  
84  
85  
86  
87  
88  
89  
90  
91  
92  
93

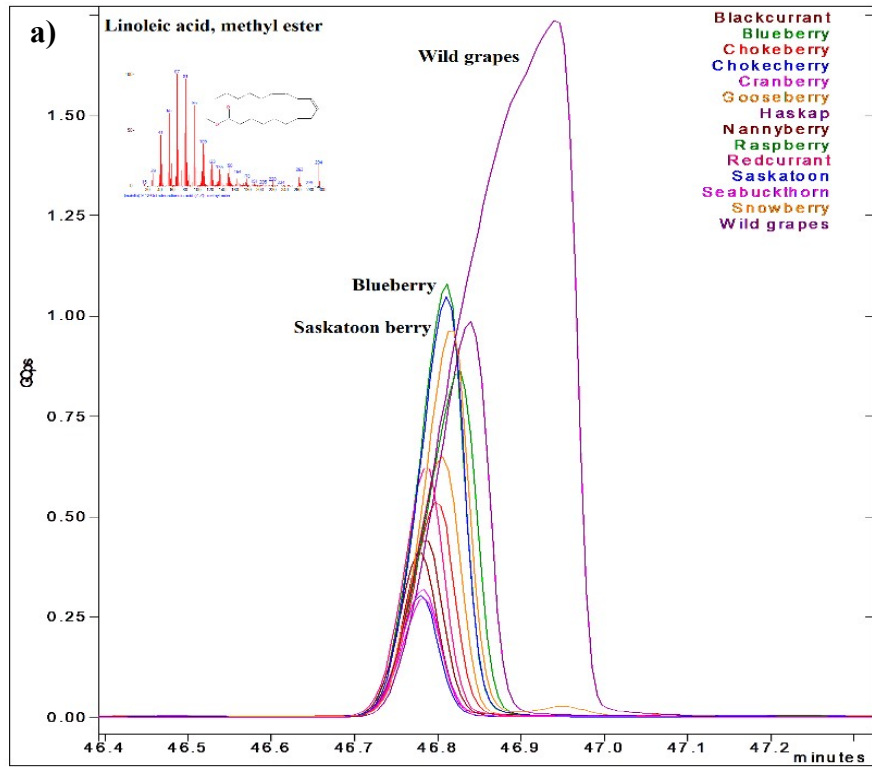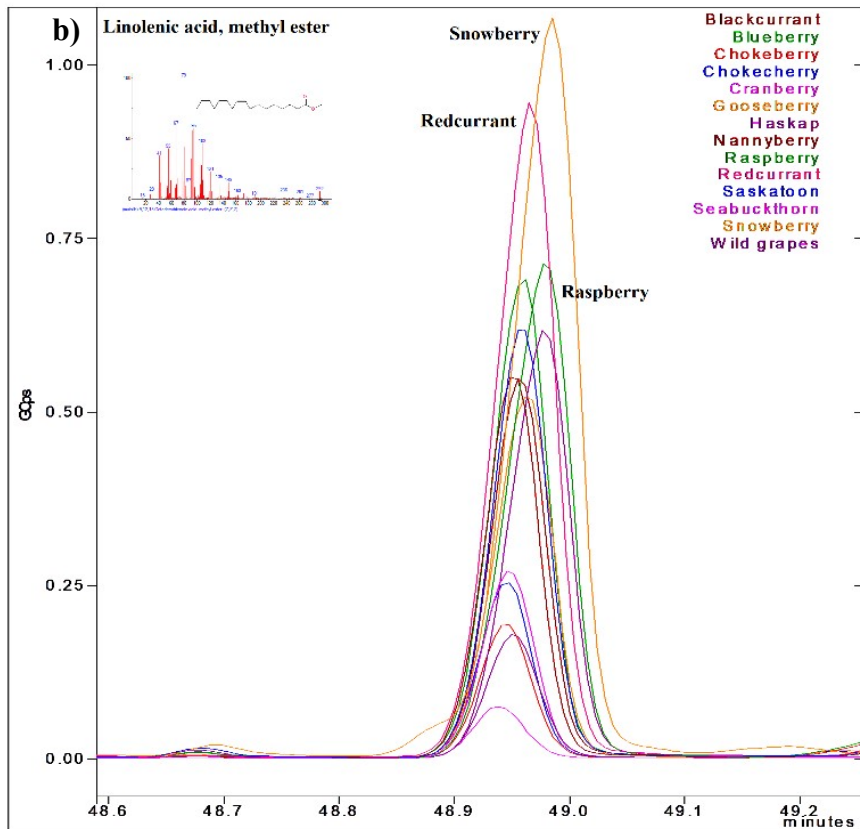

94  
 95  
 96  
 97  
 98  
 99  
 100  
 101  
 102  
 103  
 104  
 105  
 106  
 107  
 108  
 109  
 110  
 111  
 112  
 113  
 114  
 115  
 116  
 117  
 118  
 119  
 120  
 121  
 122  
 123  
 124  
 125  
 126  
 127  
 128  
 129  
 130  
 131  
 132  
 133  
 134  
 135

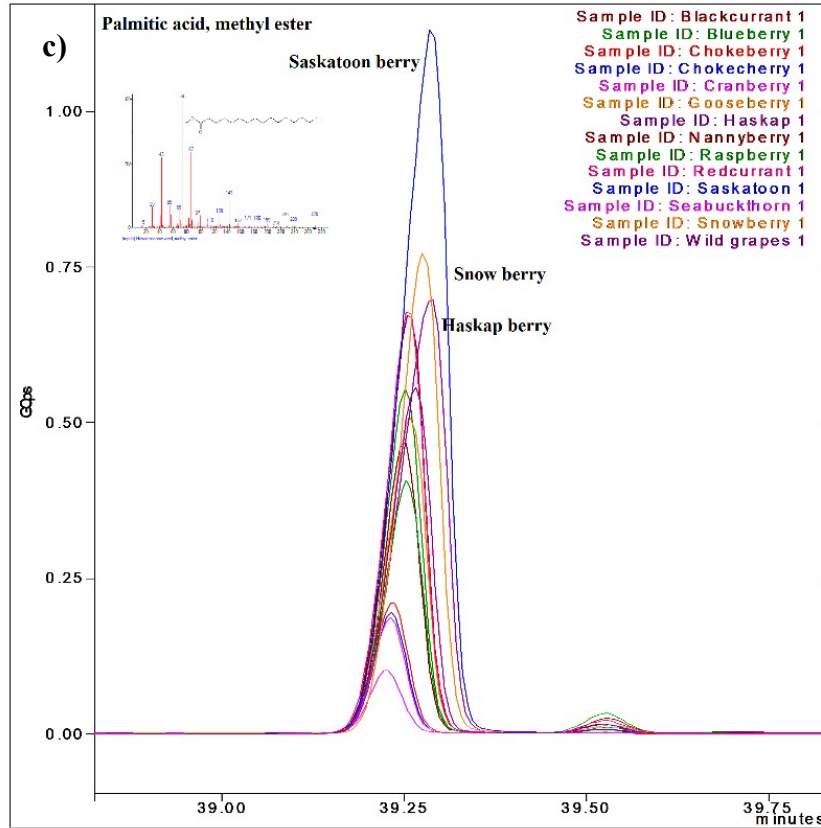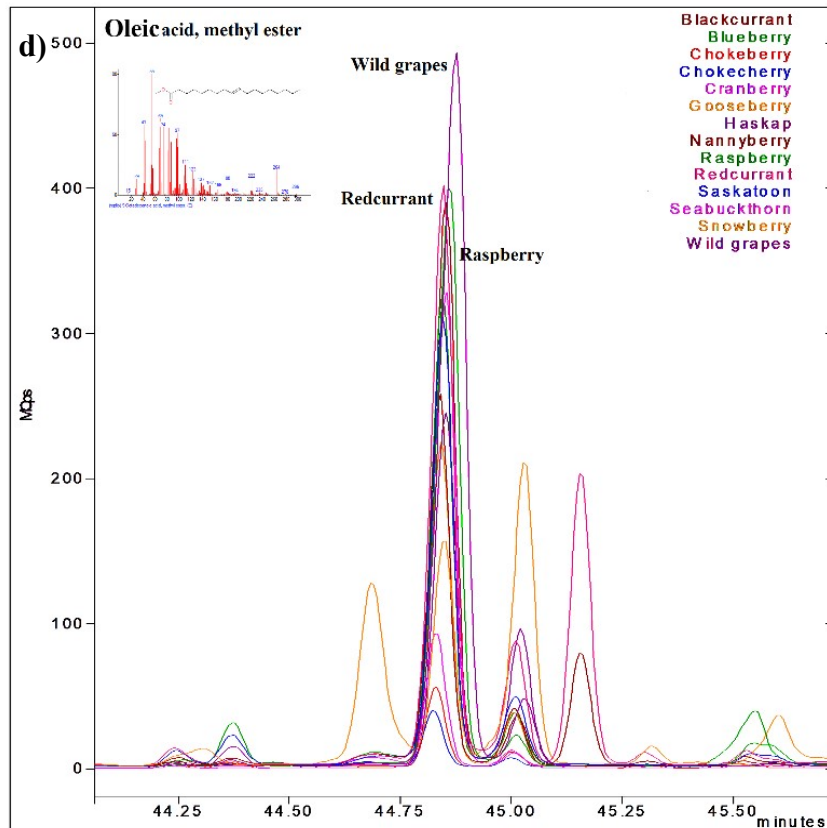

136 **Figure S3.** The GC-MS chromatograms showing the distribution of **a) Linoleic acid, b)**  
137 **Linolenic acid, c) Palmitic acid and d) Oleic acid** in Canadian wild berries

138  
139  
140  
141  
142  
143  
144  
145  
146  
147  
148  
149  
150  
151  
152  
153  
154  
155  
156  
157  
158  
159  
160  
161  
162  
163  
164  
165  
166  
167  
168  
169  
170  
171  
172  
173  
174  
175  
176  
177  
178

179 **Supplementary material 4**

180

181

182

183

184

185

186

187

188

189

190

191

192

193

194

195

196

197

198

199

200

201

202

203

204

205

206

207

208

209

210

211

212

213

214

215

216

217

218

219

220

221

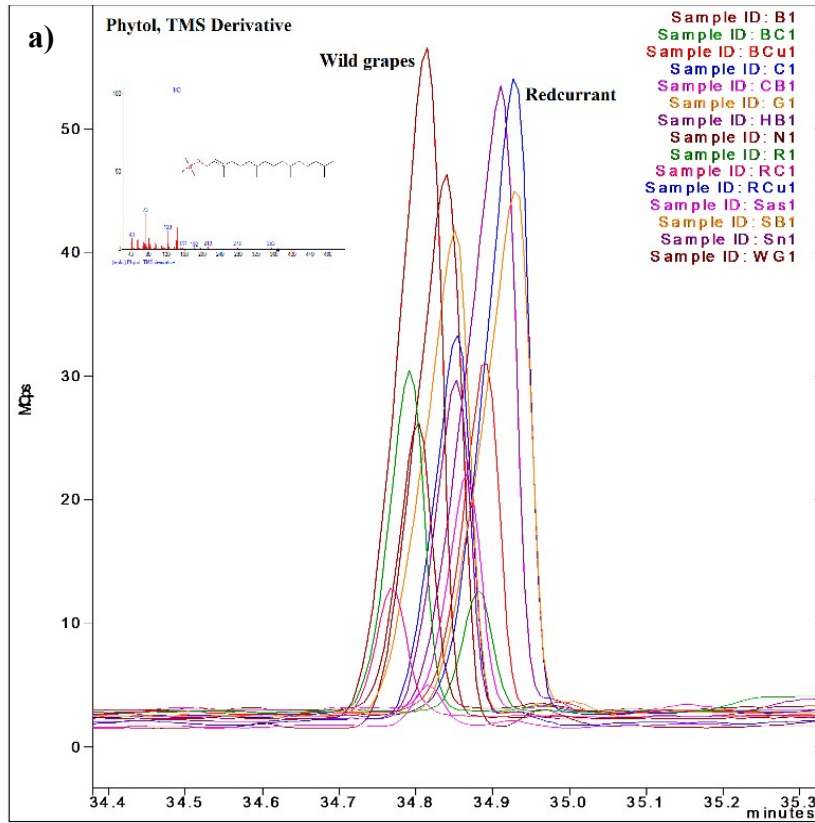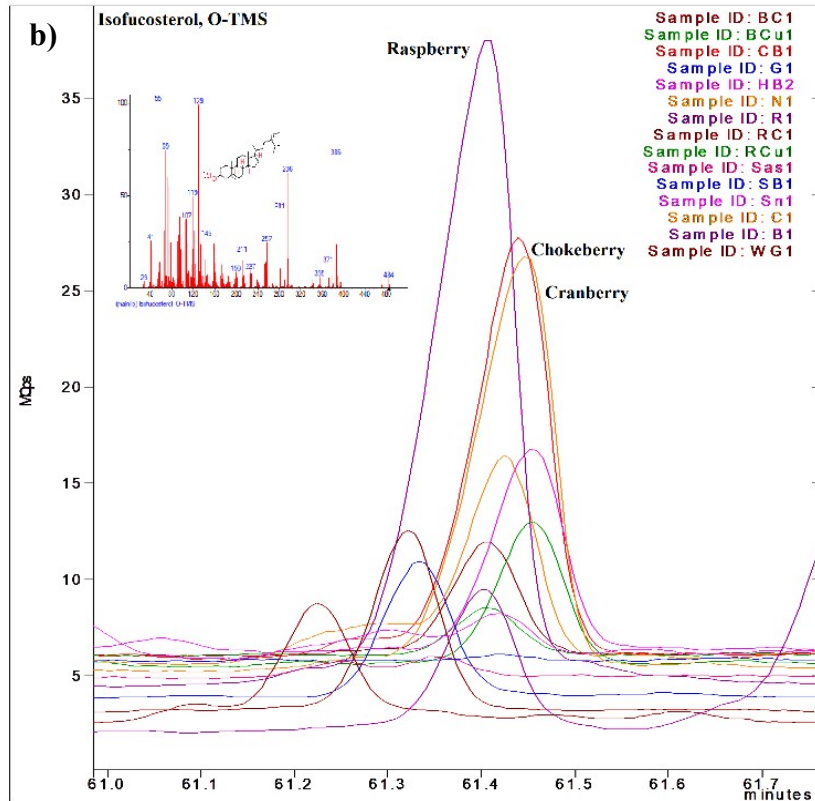

222  
 223  
 224  
 225  
 226  
 227  
 228  
 229  
 230  
 231  
 232  
 233  
 234  
 235  
 236  
 237  
 238  
 239  
 240  
 241  
 242  
 243  
 244  
 245  
 246  
 247  
 248  
 249  
 250  
 251  
 252  
 253  
 254  
 255  
 256  
 257  
 258  
 259  
 260  
 261  
 262  
 263

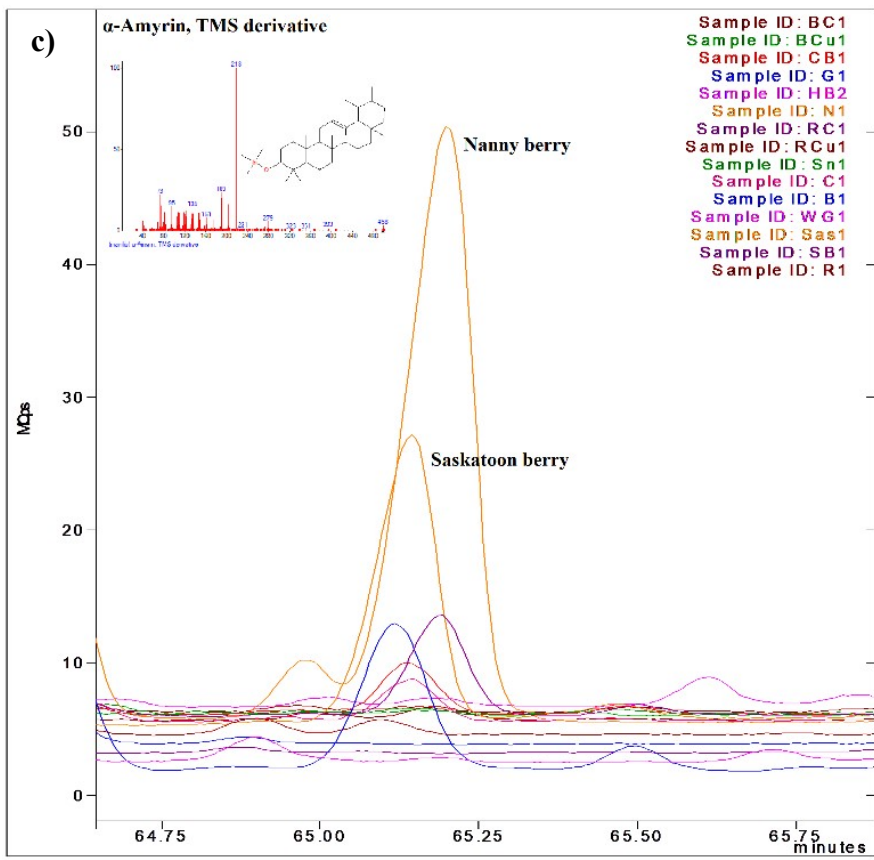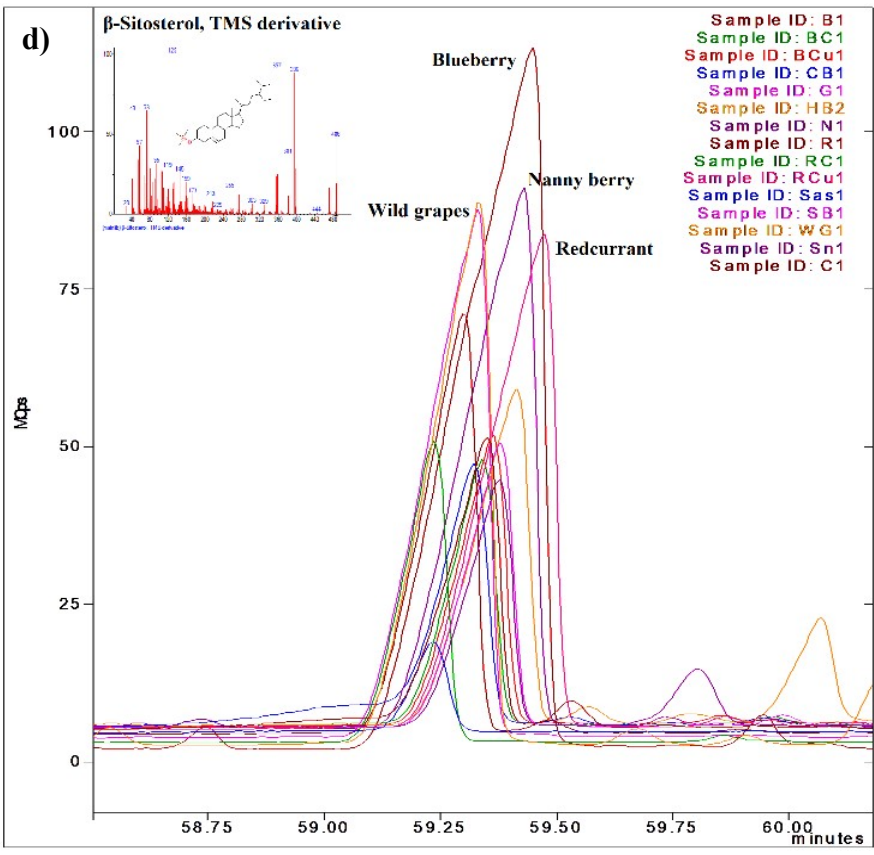



264 **Figure S4.** The distribution of **a)** Phytol, **b)** Isofucosterol, **c)**  $\alpha$ -amyrin and **d)**  $\beta$ -sitosterol in  
265 Canadian wild berries

266  
267  
268  
269  
270  
271  
272  
273  
274  
275  
276  
277  
278  
279  
280  
281  
282  
283  
284  
285  
286  
287  
288  
289  
290  
291  
292  
293  
294  
295  
296  
297  
298  
299  
300  
301  
302  
303  
304  
305  
306

307 **Supplementary material 5**

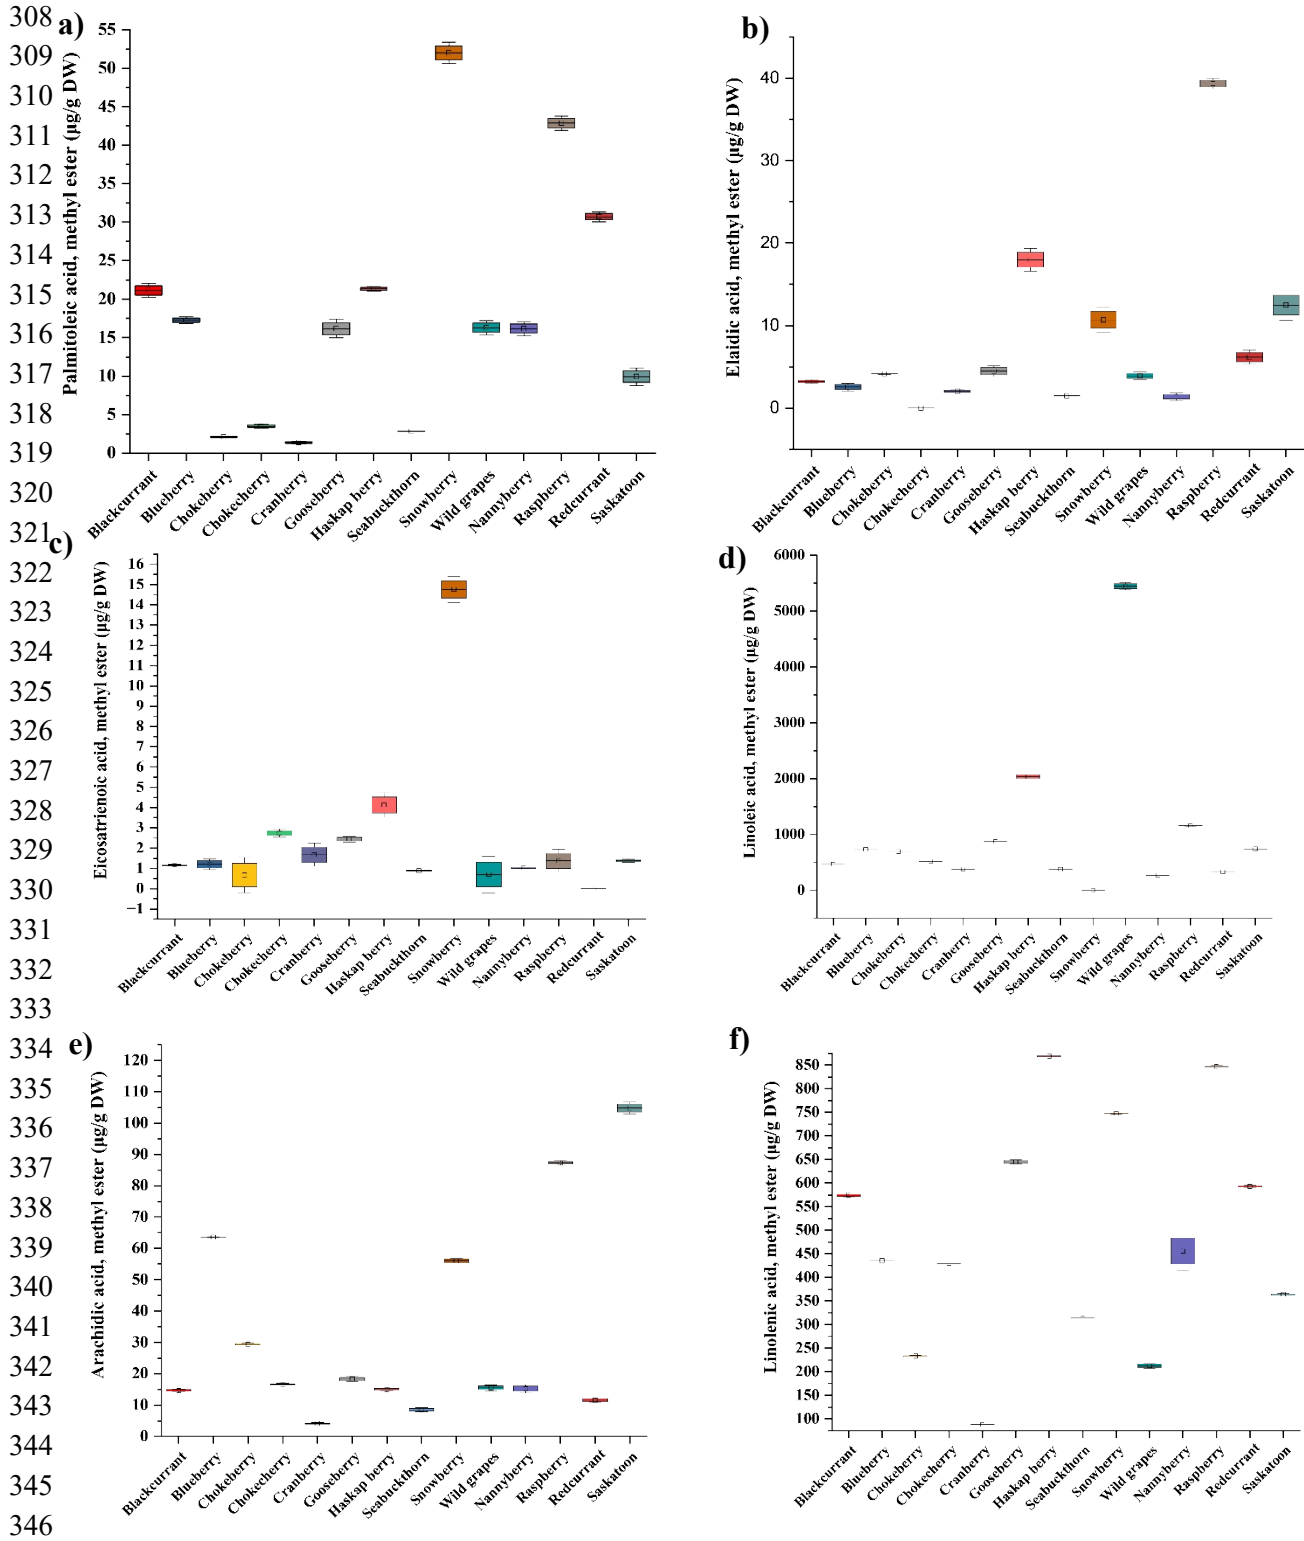

347 **Figure S5.** The box plots show the distribution of a few individual fatty acids among the  
 348 Canadian wild berries, **a)** Palmitoleic acid; **b)** Elaidic acid; **c)** Eicosatrienoic acid; **d)** Linoleic

349 acid; **e)** Arachidic acid; and **f)** Linolenic acid. The box plot line shows the mean fatty acid  
350 content of each wild berry type.  
351

352 **Supplementary material 6**

353

354

355

356

357

358

359

360

361

362

363

364

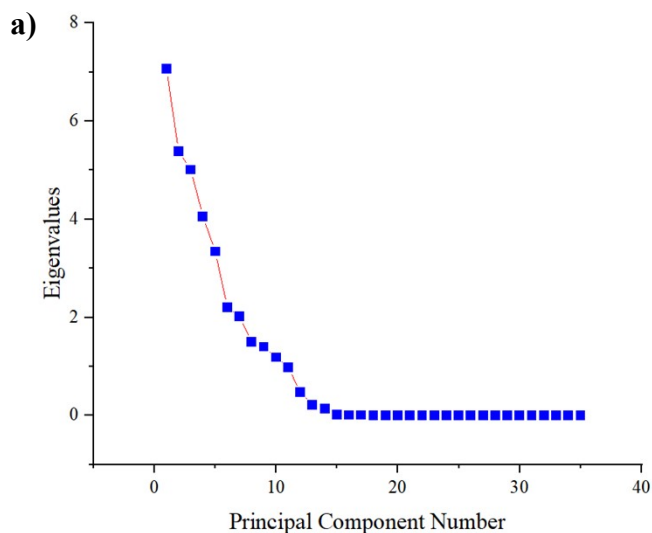

363

364

365

366

367

368

369

370

371

372

373

374

375

376

377

378

379

380

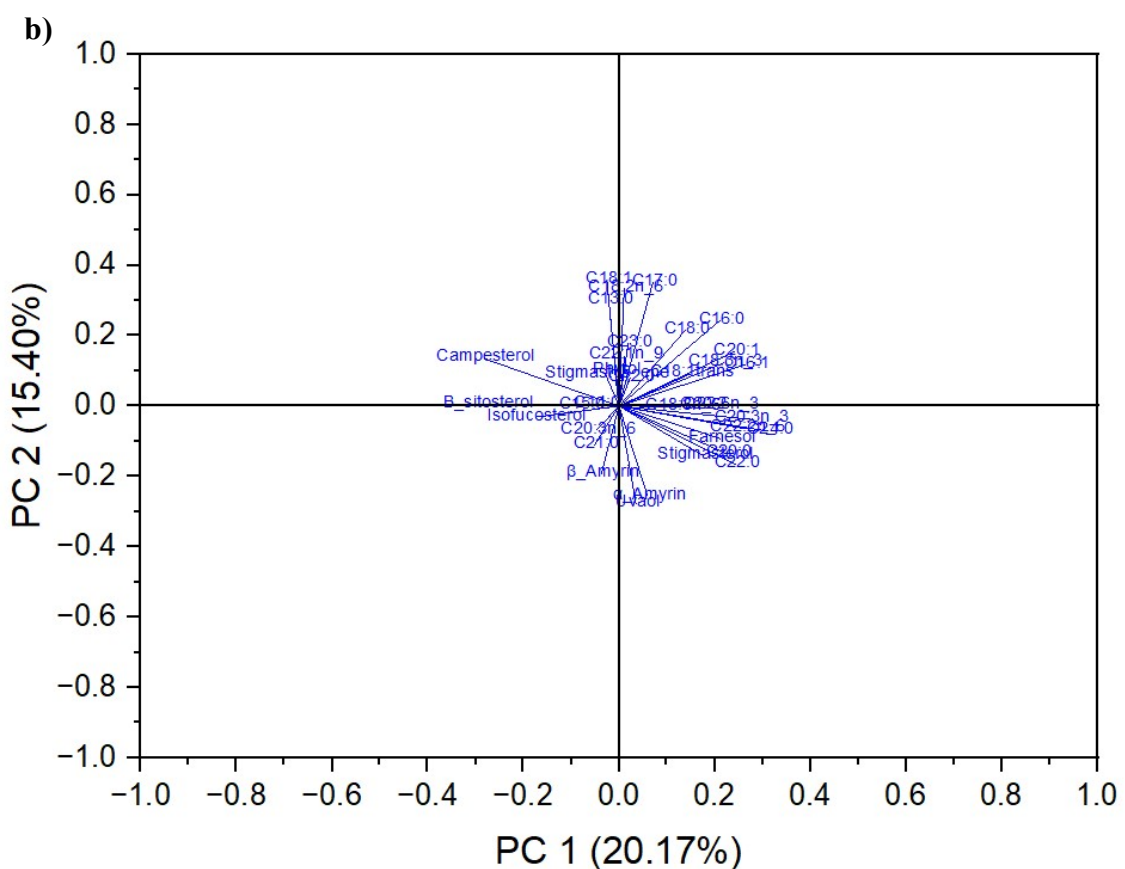

381 **Figure S6.** Principal Component Analysis (PCA) of wild berries based on their fatty acids,

382 phytochemicals and terpenes content. **a)** Scree plot and **b)** bi-plot of the compound's distribution

383 **Supplementary material 7**384 **Table S1. List of the common names of the fatty acids found in Canadian wild berries**

| <b>Omega name</b> | <b>Common name</b>                     |
|-------------------|----------------------------------------|
| C12:0             | Lauric acid, methyl ester              |
| C13:0             | Tridecanoic acid, methyl ester         |
| C14:0             | Myristic acid, methyl ester            |
| C15:0             | Pentadecanoic acid, methyl ester       |
| C16:0             | Palmitic acid, methyl ester            |
| C16:1             | Palmitoleic acid, methyl ester         |
| C17:0             | Heptadecanoic acid methyl ester        |
| C18:0             | Stearic acid, methyl ester             |
| C18:1trans        | Elaidic acid, methyl ester             |
| C18:1             | Oleic acid, methyl ester               |
| C18:2n-6          | Linoleic acid, methyl ester            |
| C20:0             | Arachidic acid, methyl ester           |
| C18:3n-6          | $\gamma$ -Linolenic acid, methyl ester |
| C20:1             | Eicosenoic acid, methyl ester          |
| C18:3n-3          | Linolenic acid, methyl ester           |
| C21:0             | Heneicosanoic acid, methyl ester       |
| C20:2             | Eicosadienoic acid, methyl ester       |
| C22:0             | Behenic acid, methyl ester             |
| C20:3n-6          | Eicosatrienoic acid, methyl ester      |
| C22:1n-9          | Erucic acid, methyl ester              |
| C20:3n-3          | Eicosatrienoic acid, methyl ester      |
| C23:0             | Tricosanoic acid, methyl ester         |
| C22:2n-6          | Docosadienoic acid, methyl ester       |
| C24:0             | Lignoceric acid, methyl ester          |
| C22:6n-3          | Docosahexaenoic acid, methyl ester     |

385

386

387

388

389

390

391

392

393

394

| Fatty Acid Methyl Ester/Volatile Compound Structure                                 |                                                                                     |                                                                                       |
|-------------------------------------------------------------------------------------|-------------------------------------------------------------------------------------|---------------------------------------------------------------------------------------|
| 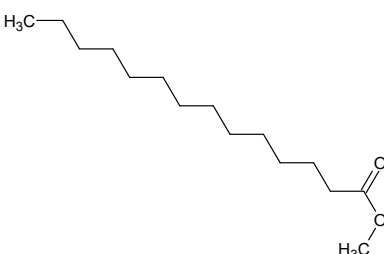   |    |    |
| Methyl myristate C14:0                                                              | Methyl pentadecanoate C15:0                                                         | Methyl palmitate C16:0                                                                |
|    |    |    |
| Methyl palmitoleate C16:1                                                           | Methyl stearate C18:0                                                               | Methyl elaidate C18:1 trans                                                           |
|   |   |   |
| Methyl oleate C18:1 cis                                                             | Methyl linoleate C18:2                                                              | Methyl arachidate C20:0                                                               |
|  |  |  |
| Methyl linolenate C18:3                                                             | Methyl behenate C22:0                                                               | Methyl tricosanoate C23:0                                                             |

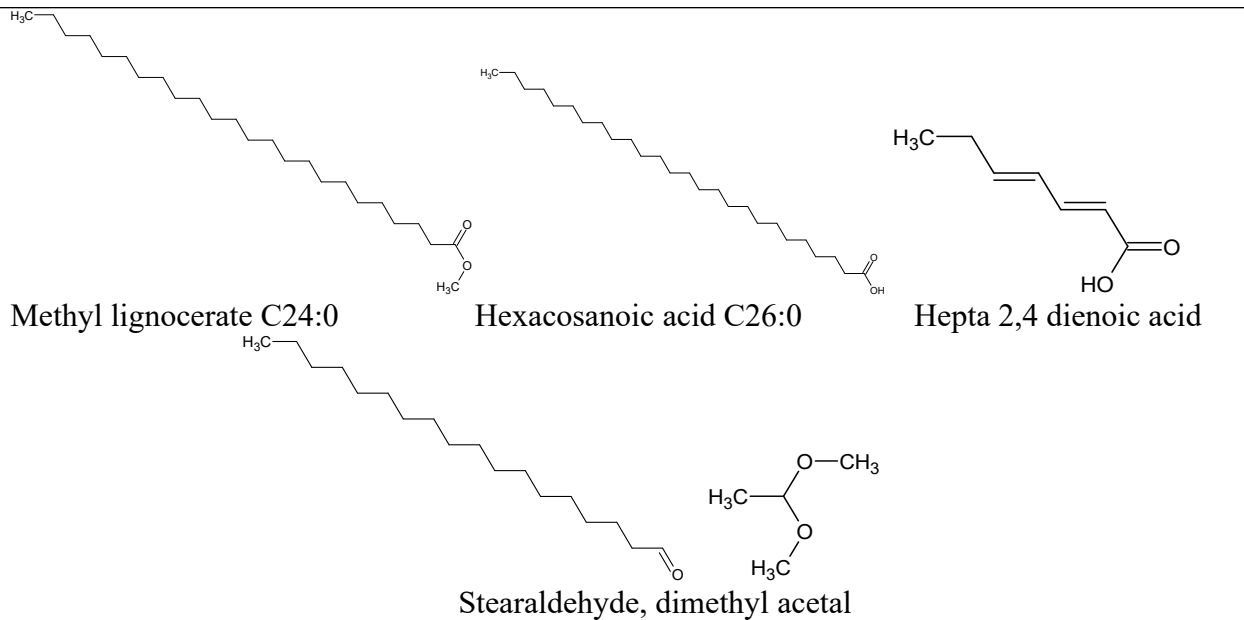

397

398

399
